# Supplementary material for: Classification of spectral fine structures of Saturn kilometric radiation
Source: Copernicus journal article supplement (doi:10.5194/angeo-2022-7), 2022-02-15

# Projection into equatorial plane

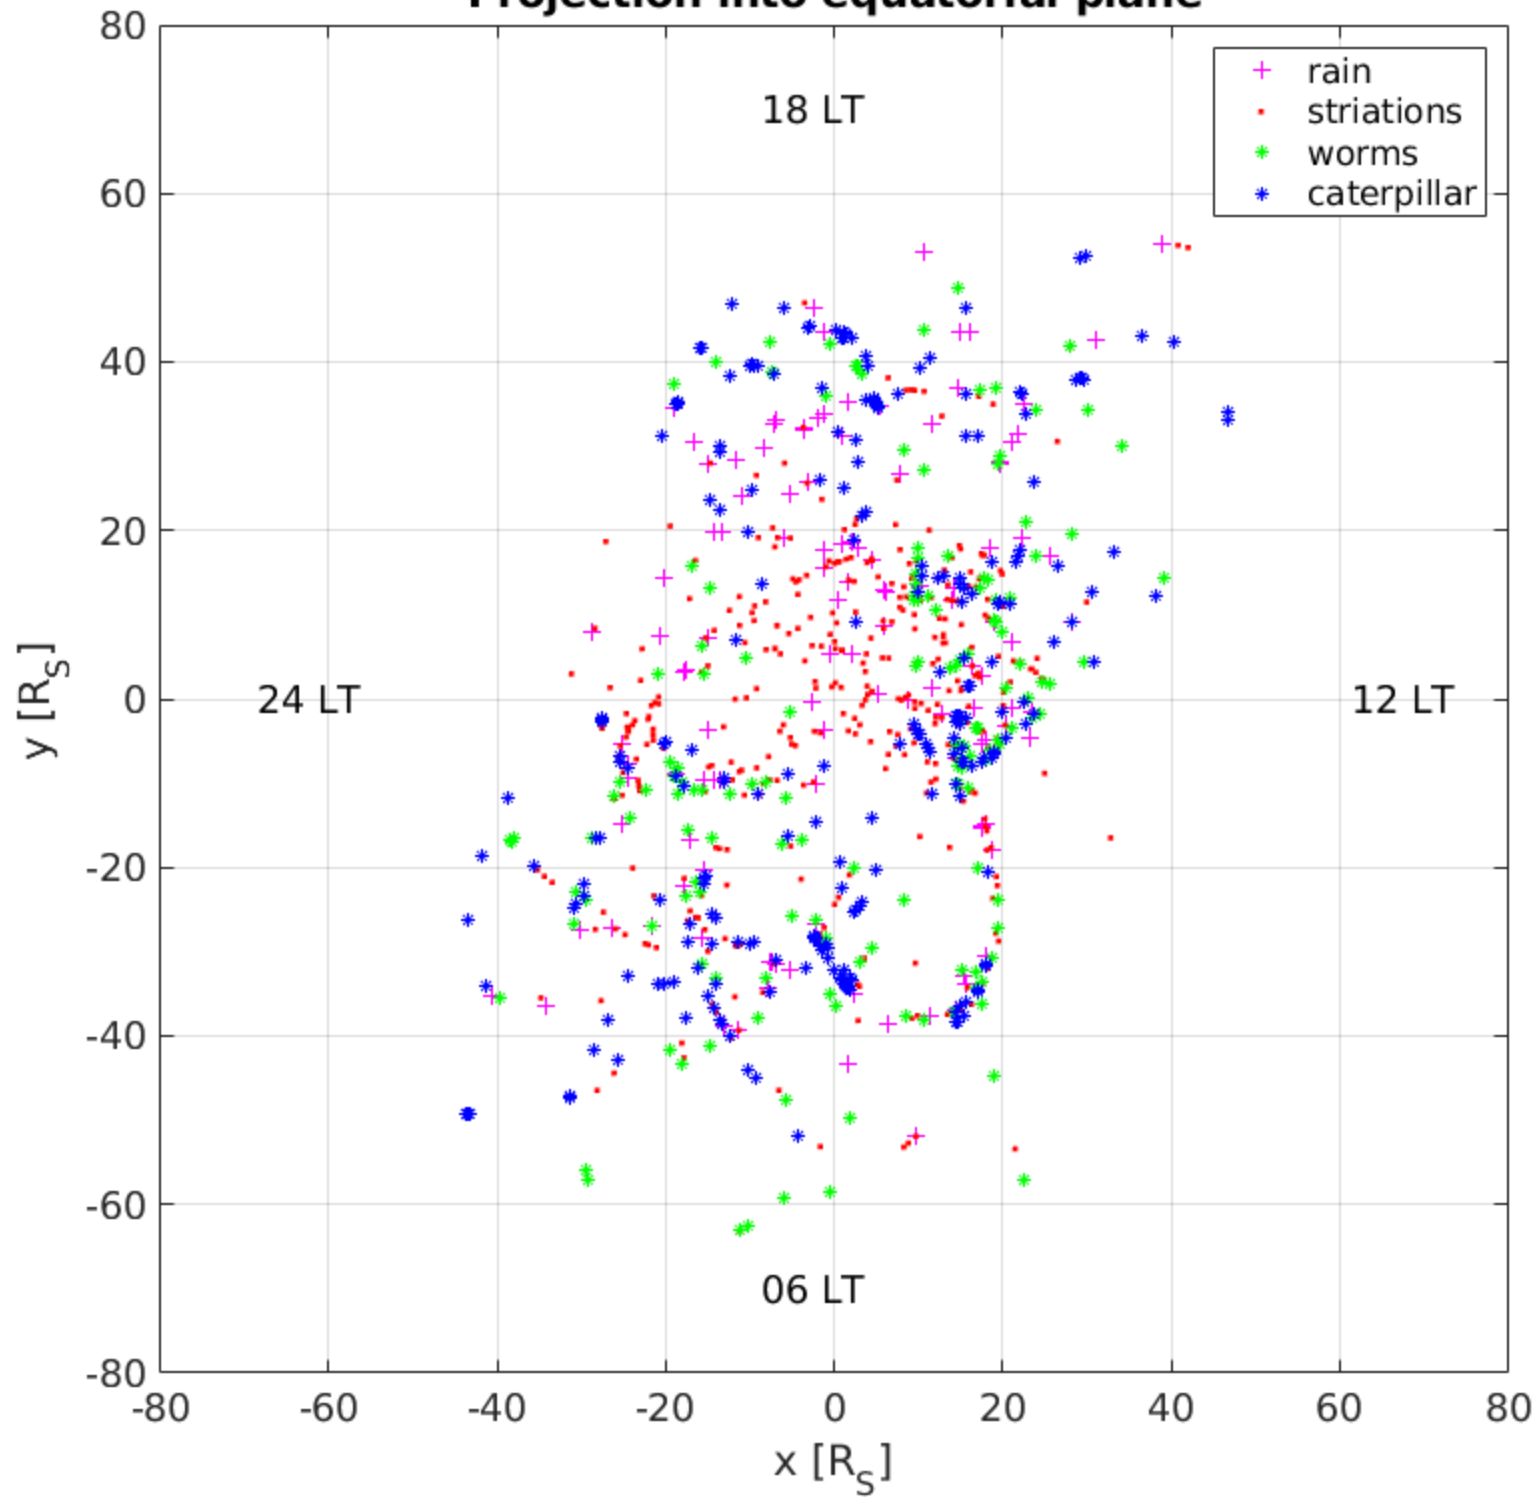

Supplement: Supplementary file [file angeo-2022-7-AC2-supplement.pdf]
